# Supplementary figures and images for: Cationic Salecan-based hydrogels for release of 5-fluorouracil
Source: Royal Society of Chemistry journal article supplement (doi:10.1039/c7ra01052d), 2017-01-01

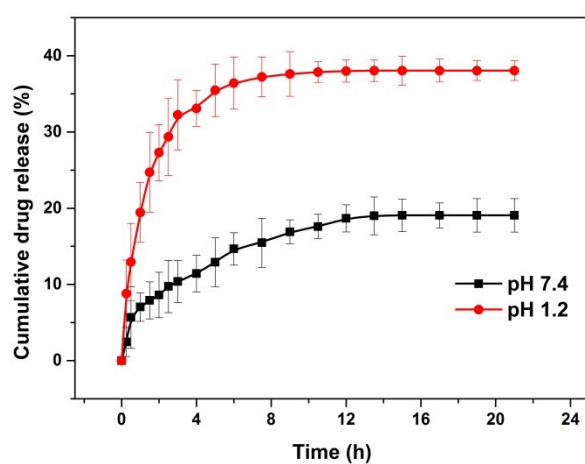

**Figure S1.** In vitro 5-fluorouracil release curves from the PDMC hydrogels at pH 1.2 and pH 7.4.

Supplement: c7ra01052d1.pdf [file c7ra01052d1.pdf]
